# Supplementary material for: Predicting acute termination and non-termination during ablation of human atrial fibrillation using quantitative indices
Source: Frontiers journal article supplement (doi:10.3389/fphys.2022.939350), 2022-11-22
Supplement: Data_Sheet_1.PDF [file Data_Sheet_1.PDF]

# Supplementary Figure 1

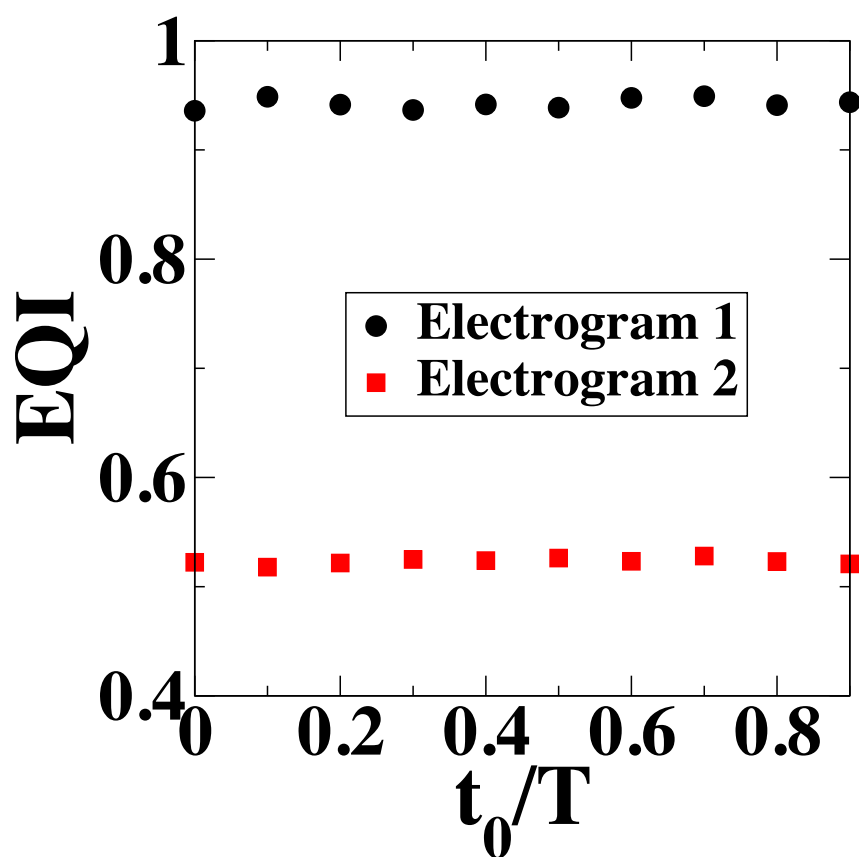

**Fig. S1.** The EQI for the two electrograms shown in Fig. 4 (electrogram 1 (2) corresponds to Fig. 4A (B)) as a function of the start time of the first time window  $t_0$ , normalized by the period  $T$ . The EQI did not change by more than 1.5%.
